# Supplementary material
Source: PubMed Central journal article supplement (PMC3834798)
Supplement: supp_btt533_Supplement_olshenetal.pdf [file supp_btt533_Supplement_olshenetal.pdf]

## **Supplementary Materials for**

Assessing gene-level translational control from ribosome profiling

A.B. Olshen, A.C. Hsieh, C.R. Stumpf, R.A. Olshen, D. Ruggero, B.S. Taylor\*

\*To whom correspondence should be addressed: [barry.taylor@ucsf.edu](mailto:barry.taylor@ucsf.edu)

## SUPPLEMENTARY FIGURES

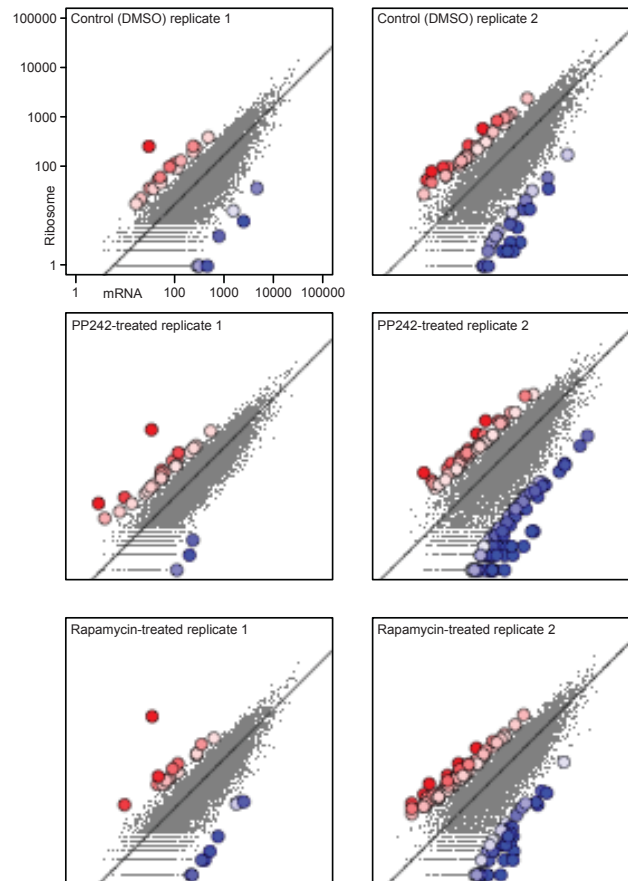

**Supplementary Figure 1: mRNAs with significant translational regulation.** Babel analysis identifies genes within and between conditions with significant mRNA translation (red and blue are greater or less than expected ribosome association given mRNA abundance levels; for graphical purposes,  $p$ -value  $< 0.001$  in each sample). Here, the top row is control while the middle and bottom are PP242- and Rapamycin-treated PC3 cells, respectively, from sequencing data obtained in Hsieh et al. The black line represents the fit of the trimmed regression described in the Methods.

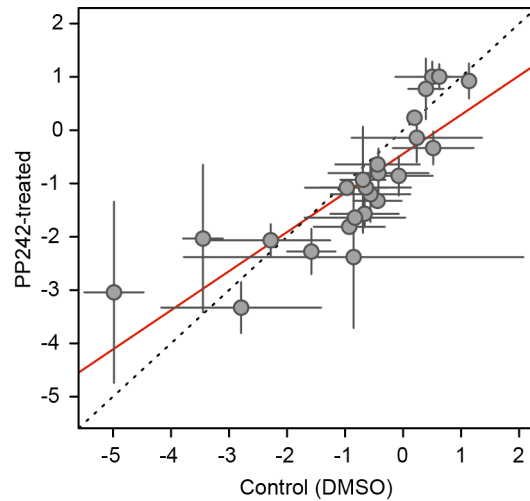

**Supplementary Figure 2: Presumptive false negatives from Babel analysis.** Among 24 genes that were identified in the original analysis, but were not significant in Babel, the average translational efficiency (calculated as in Hsieh et al.) is shown in both treated (PP242) and control (DMSO) cells, as is its variability between replicates in each condition (red line; regression, dashed line is the diagonal).

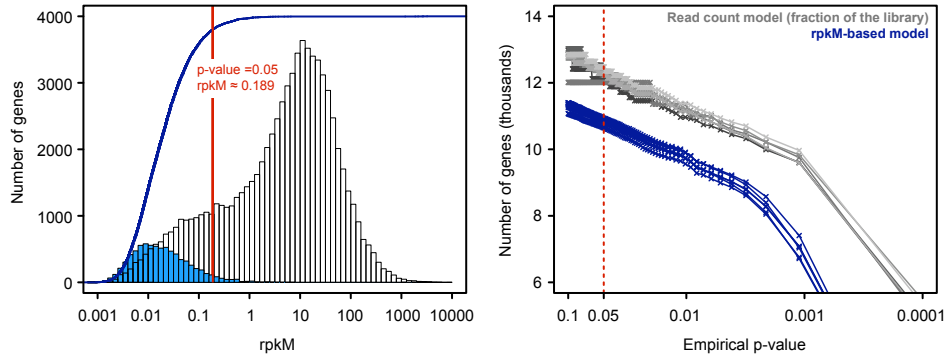

**Supplementary Figure 3: Determining expressed genes. A.** The distribution of normalized rpkm values in gene models is juxtaposed to a distribution of random regions of the genome masked of transcribed content (light blue; left panel). The distribution is estimated from the latter (dark blue) and p-values are assigned to each gene in each sample. Expressed genes are those with a nominal p-value  $< 0.05$ , which in this example corresponds to an rpkm of greater than 0.189 (see Methods). **B.** The number of expressed genes at multiple cutoffs is stable across replicates and conditions (in blue; based on an rpkm model, as in panel A). While a similar method based on read counts alone (gray) produces more seemingly expressed genes at a given p-value, it does not incorporate gene size.

## SUPPLEMENTARY TABLES

| Replicates               | Mean           | Median         | Proportion of p-values |                |                |                |
|--------------------------|----------------|----------------|------------------------|----------------|----------------|----------------|
|                          |                |                | >0.999                 | >0.95          | <0.05          | <0.001         |
| <i>Within-condition</i>  |                |                |                        |                |                |                |
| 1                        | 0.4919 (0.005) | 0.4837 (0.007) | 0.0014 (5e-04)         | 0.0508 (0.005) | 0.0462 (0.004) | 4e-04 (2e-04)  |
| 2                        | 0.4882 (0.004) | 0.4836 (0.007) | 0.0011 (4e-04)         | 0.0471 (0.003) | 0.0521 (0.003) | 7e-04 (3e-04)  |
| 3                        | 0.4858 (0.005) | 0.4792 (0.007) | 0.0010 (4e-04)         | 0.0454 (0.003) | 0.0543 (0.003) | 9e-04 (3e-04)  |
| <i>Between-condition</i> |                |                |                        |                |                |                |
| 2                        | 0.4960 (0.002) | 0.4944 (0.003) | 0.0010 (3e-04)         | 0.0496 (0.002) | 0.0503 (0.002) | 0.0011 (3e-04) |

**Supplementary Table 1: Simulations for size (type I error).** Shown are averages (and standard deviations) across all samples as well as the proportion of p-values above and below the given significance levels.

| Direction of change      | RNA level <sup>[a]</sup> | Fold change | Sample size ( $\alpha = 0.05$ ) |             |             |             |
|--------------------------|--------------------------|-------------|---------------------------------|-------------|-------------|-------------|
|                          |                          |             | 1                               | 2           | 3           |             |
| <i>Within-condition</i>  |                          |             |                                 |             |             |             |
| Up                       | Low                      | 2           | 0.32 (0.06)                     | 0.46 (0.07) | 0.57 (0.07) |             |
|                          |                          | 3           | 0.58 (0.07)                     | 0.73 (0.07) | 0.83 (0.06) |             |
|                          |                          | 4           | 0.73 (0.06)                     | 0.86 (0.06) | 0.93 (0.03) |             |
|                          | Mid                      | 2           | 0.38 (0.07)                     | 0.49 (0.07) | 0.61 (0.08) |             |
|                          |                          | 3           | 0.64 (0.07)                     | 0.77 (0.06) | 0.86 (0.06) |             |
|                          |                          | 4           | 0.78 (0.06)                     | 0.87 (0.05) | 0.93 (0.04) |             |
|                          | High                     | 2           | 0.39 (0.07)                     | 0.50 (0.08) | 0.61 (0.07) |             |
|                          |                          | 3           | 0.65 (0.07)                     | 0.78 (0.07) | 0.87 (0.05) |             |
|                          |                          | 4           | 0.79 (0.06)                     | 0.89 (0.05) | 0.95 (0.04) |             |
|                          | Down                     | Low         | 2                               | 0.10 (0.05) | 0.20 (0.06) | 0.29 (0.06) |
|                          |                          |             | 3                               | 0.19 (0.06) | 0.43 (0.07) | 0.62 (0.06) |
|                          |                          |             | 4                               | 0.28 (0.06) | 0.60 (0.06) | 0.77 (0.06) |
| Mid                      |                          | 2           | 0.23 (0.06)                     | 0.39 (0.08) | 0.56 (0.08) |             |
|                          |                          | 3           | 0.44 (0.08)                     | 0.75 (0.07) | 0.90 (0.05) |             |
|                          |                          | 4           | 0.61 (0.07)                     | 0.92 (0.04) | 0.99 (0.02) |             |
| High                     |                          | 2           | 0.24 (0.06)                     | 0.42 (0.07) | 0.59 (0.08) |             |
|                          |                          | 3           | 0.47 (0.07)                     | 0.79 (0.06) | 0.93 (0.04) |             |
|                          |                          | 4           | 0.67 (0.07)                     | 0.95 (0.03) | 1.00 (0.01) |             |
| <i>Between-condition</i> |                          |             |                                 |             |             |             |
| Up                       |                          | Low         | 2                               | 0.11 (0.04) | 0.19 (0.05) | 0.27 (0.06) |
|                          |                          |             | 3                               | 0.25 (0.06) | 0.42 (0.07) | 0.59 (0.08) |
|                          | 4                        |             | 0.37 (0.06)                     | 0.62 (0.07) | 0.80 (0.05) |             |
|                          | Mid                      | 2           | 0.17 (0.05)                     | 0.26 (0.07) | 0.38 (0.07) |             |
|                          |                          | 3           | 0.33 (0.07)                     | 0.55 (0.08) | 0.72 (0.07) |             |
|                          |                          | 4           | 0.49 (0.07)                     | 0.73 (0.07) | 0.88 (0.05) |             |
|                          | High                     | 2           | 0.18 (0.05)                     | 0.28 (0.06) | 0.41 (0.07) |             |
|                          |                          | 3           | 0.35 (0.07)                     | 0.57 (0.07) | 0.75 (0.06) |             |
|                          |                          | 4           | 0.51 (0.07)                     | 0.76 (0.07) | 0.90 (0.04) |             |
|                          | Down                     | Low         | 2                               | 0.05 (0.03) | 0.09 (0.04) | 0.14 (0.04) |
|                          |                          |             | 3                               | 0.08 (0.04) | 0.17 (0.06) | 0.29 (0.06) |
|                          |                          |             | 4                               | 0.11 (0.04) | 0.25 (0.06) | 0.41 (0.07) |
| Mid                      |                          | 2           | 0.10 (0.04)                     | 0.17 (0.06) | 0.27 (0.07) |             |
|                          |                          | 3           | 0.17 (0.06)                     | 0.34 (0.07) | 0.52 (0.07) |             |
|                          |                          | 4           | 0.24 (0.06)                     | 0.49 (0.08) | 0.70 (0.07) |             |
| High                     |                          | 2           | 0.10 (0.04)                     | 0.18 (0.06) | 0.28 (0.07) |             |
|                          |                          | 3           | 0.18 (0.05)                     | 0.36 (0.07) | 0.55 (0.07) |             |
|                          |                          | 4           | 0.26 (0.06)                     | 0.53 (0.07) | 0.74 (0.06) |             |

[a] Genes in either the bottom 5% (low), middle 90% (mid), or top 5% (high) of the distribution of mRNA expression

**Supplementary Table 2: Simulations for power.** Here, values are averages (and standard deviations) across samples for the power to identify altered genes within and between conditions at the significance level indicated.

| ID                  | Symbol         | One-sided P-value |           |          | PP242 versus DMSO |          |          |
|---------------------|----------------|-------------------|-----------|----------|-------------------|----------|----------|
|                     |                | DMSO              | Rapamycin | PP242    | Z-statistic       | P-value  | Q-value  |
| ENSG00000139675.10  | HNRNPA1L2      | 4.50E-08          | 5.93E-05  | 0.5511   | 7.306             | 2.74E-13 | 2.89E-09 |
| ENSG00000231500.2   | RPS18          | 0.1517            | 0.9306    | 0.9999   | 6.127             | 8.96E-10 | 4.72E-06 |
| ENSG00000244165.1   | P2RY11         | 0.4745            | 0.9369    | 0.9996   | 5.330             | 9.82E-08 | 0.0002   |
| ENSG00000105717.5*  | PBX4           | 0.2222            | 0.9356    | 0.9965   | 5.251             | 1.52E-07 | 0.0002   |
| ENSG00000154589.2*  | LY96           | 0.0014            | 0.6512    | 0.8115   | 5.223             | 1.76E-07 | 0.0002   |
| ENSG00000143632.8   | ACTA1          | 0.0009            | 0.4487    | 0.5294   | 4.811             | 1.50E-06 | 0.0011   |
| ENSG00000189167.6   | ZAR1L          | 0.0055            | 0.0373    | 0.8384   | 4.536             | 5.73E-06 | 0.0032   |
| ENSG00000104369.4*  | JPH1           | 0.2482            | 0.5513    | 0.9862   | 4.491             | 7.09E-06 | 0.0037   |
| ENSG00000105649.3   | RAB3A          | 0.0566            | 0.2962    | 0.9685   | 4.430             | 9.43E-06 | 0.0045   |
| ENSG00000149300.5*  | C11orf52       | 0.0200            | 0.0588    | 0.9384   | 4.429             | 9.46E-06 | 0.0045   |
| ENSG00000204271.4   | SPIN3          | 0.0386            | 0.0070    | 3.06E-07 | -4.395            | 1.11E-05 | 0.0050   |
| ENSG00000036448.5   | MYOM2          | 0.0414            | 0.6197    | 0.7790   | 4.336             | 1.45E-05 | 0.0058   |
| ENSG00000108272.8   | DHRS11         | 0.4152            | 0.2090    | 0.9985   | 4.165             | 3.12E-05 | 0.0094   |
| ENSG00000173267.9*  | SNCG           | 0.0638            | 0.2376    | 0.9501   | 4.158             | 3.21E-05 | 0.0094   |
| ENSG00000185519.8*  | FAM131C        | 0.2534            | 0.5337    | 0.9668   | 4.129             | 3.64E-05 | 0.0101   |
| ENSG00000186868.9   | MAPT           | 0.1259            | 0.6869    | 0.9413   | 4.079             | 4.53E-05 | 0.0111   |
| ENSG00000181826.5*  | RELL1          | 0.7674            | 0.0148    | 0.0080   | -4.044            | 5.26E-05 | 0.0126   |
| ENSG00000122696.8   | MCART1         | 0.1807            | 0.0078    | 0.0001   | -4.037            | 5.41E-05 | 0.0127   |
| ENSG00000167525.8*  | PROCA1         | 0.4498            | 0.9920    | 0.9955   | 3.995             | 6.48E-05 | 0.0135   |
| ENSG00000198633.5   | ZNF534         | 0.0627            | 0.3249    | 0.0004   | -3.901            | 9.60E-05 | 0.0181   |
| ENSG00000258920.1*  | RP11-33N16.1.1 | 0.9952            | 0.7239    | 0.6124   | -3.887            | 0.0001   | 0.0187   |
| ENSG00000175787.11* | ZNF169         | 0.6456            | 0.1089    | 0.0153   | -3.877            | 0.0001   | 0.0189   |
| ENSG00000119608.7*  | PROX2          | 0.9140            | 0.9610    | 1.0000   | 3.877             | 0.0001   | 0.0189   |
| ENSG00000119227.3*  | PIGZ           | 0.6201            | 0.1483    | 0.9994   | 3.825             | 0.0001   | 0.0227   |
| ENSG00000197444.5   | OGDHL          | 0.1662            | 0.9447    | 0.9827   | 3.755             | 0.0002   | 0.0290   |
| ENSG00000145088.4*  | EAF2           | 0.0133            | 0.7132    | 0.6631   | 3.747             | 0.0002   | 0.0294   |
| ENSG00000117010.11  | ZNF684         | 0.4299            | 0.1574    | 0.0038   | -3.635            | 0.0003   | 0.0424   |
| ENSG00000204257.8*  | HLA-DMA        | 0.3564            | 0.9267    | 0.9754   | 3.615             | 0.0003   | 0.0452   |
| ENSG00000212127.5*  | TAS2R14        | 0.9977            | 0.9572    | 0.7442   | -3.578            | 0.0003   | 0.0500   |
| ENSG00000188763.3*  | FZD9           | 0.1366            | 0.1566    | 0.8063   | 3.572             | 0.0004   | 0.0504   |
| ENSG00000151846.6   | PABPC3         | 0.9597            | 0.9998    | 1.0000   | 3.542             | 0.0004   | 0.0551   |
| ENSG00000188992.6*  | LIPI           | 0.3335            | 0.8160    | 0.9882   | 3.524             | 0.0004   | 0.0574   |
| ENSG00000188037.6*  | CLCN1          | 0.4584            | 0.3305    | 0.9905   | 3.514             | 0.0004   | 0.0588   |
| ENSG00000133460.13* | SLC2A11        | 0.6192            | 0.9990    | 0.9986   | 3.478             | 0.0005   | 0.0658   |
| ENSG00000180574.3   | EIF2S3L.1      | 0.0012            | 0.1199    | 0.3256   | 3.470             | 0.0005   | 0.0663   |
| ENSG00000189221.5*  | MAOA           | 0.1715            | 0.9821    | 0.9746   | 3.469             | 0.0005   | 0.0663   |
| ENSG00000240303.3   | ACAD11         | 0.0957            | 0.7912    | 0.9290   | 3.446             | 0.0006   | 0.0706   |
| ENSG00000114948.7*  | ADAM23         | 0.9957            | 0.8746    | 0.6600   | -3.421            | 0.0006   | 0.0747   |
| ENSG00000165689.12  | SDCCAG3        | 0.9998            | 0.9987    | 0.8387   | -3.413            | 0.0006   | 0.0759   |
| ENSG00000117983.12  | MUC5B          | 0.0464            | 0.0222    | 0.7712   | 3.405             | 0.0007   | 0.0767   |
| ENSG00000204539.3*  | CDSN           | 0.3032            | 0.3972    | 0.9825   | 3.389             | 0.0007   | 0.0773   |
| ENSG00000107581.6   | EIF3A          | 0.0003            | 0.0071    | 0.1783   | 3.385             | 0.0007   | 0.0773   |
| ENSG00000180176.10* | TH             | 0.3571            | 0.0417    | 0.9374   | 3.385             | 0.0007   | 0.0773   |
| ENSG00000175390.7   | EIF3F          | 0.2147            | 0.5498    | 0.9749   | 3.385             | 0.0007   | 0.0773   |
| ENSG00000213139.3*  | CRYGS          | 0.9990            | 0.9955    | 0.8313   | -3.380            | 0.0007   | 0.0773   |
| ENSG00000167595.8   | C19orf55       | 0.6083            | 0.0484    | 0.0119   | -3.378            | 0.0007   | 0.0773   |
| ENSG00000180346.2   | TIGD2          | 0.5058            | 0.7542    | 0.0065   | -3.377            | 0.0007   | 0.0773   |

|                     |          |        |        |          |        |        |        |
|---------------------|----------|--------|--------|----------|--------|--------|--------|
| ENSG00000099365.5*  | STX1B    | 0.9968 | 0.4617 | 0.5316   | -3.364 | 0.0008 | 0.0799 |
| ENSG00000183496.5   | MEX3B    | 0.9966 | 0.9642 | 0.5346   | -3.362 | 0.0008 | 0.0799 |
| ENSG00000177570.9   | SAMD12   | 0.0130 | 0.0124 | 1.93E-06 | -3.347 | 0.0008 | 0.0826 |
| ENSG00000166069.9   | TMCO5A   | 0.0475 | 0.8299 | 0.7545   | 3.347  | 0.0008 | 0.0826 |
| ENSG00000172053.10  | QARS     | 0.0231 | 0.1686 | 0.7808   | 3.342  | 0.0008 | 0.0833 |
| ENSG00000185339.4*  | TCN2     | 0.2023 | 0.5799 | 0.7191   | 3.319  | 0.0009 | 0.0898 |
| ENSG00000110090.7   | CPT1A    | 0.0000 | 0.0001 | 0.0117   | 3.296  | 0.0010 | 0.0957 |
| ENSG00000203724.6*  | C1orf53  | 0.7011 | 0.4060 | 0.9789   | 3.275  | 0.0011 | 0.1011 |
| ENSG00000135722.3*  | FBXL8    | 0.6311 | 0.9390 | 0.9634   | 3.275  | 0.0011 | 0.1011 |
| ENSG00000143545.4   | RAB13    | 0.2340 | 0.4487 | 0.9764   | 3.252  | 0.0011 | 0.1088 |
| ENSG00000165496.3*  | RPL10L   | 0.2066 | 0.9144 | 0.8340   | 3.204  | 0.0014 | 0.1252 |
| ENSG00000136942.9   | RPL35    | 0.2061 | 0.3337 | 0.9608   | 3.204  | 0.0014 | 0.1252 |
| ENSG00000120662.10  | MTRF1    | 0.1934 | 0.5507 | 0.6411   | 3.200  | 0.0014 | 0.1253 |
| ENSG00000174370.5*  | C11orf45 | 0.3819 | 0.4550 | 0.9565   | 3.199  | 0.0014 | 0.1253 |
| ENSG00000104129.4   | DNAJC17  | 0.1175 | 0.1818 | 0.8014   | 3.180  | 0.0015 | 0.1327 |
| ENSG00000165730.10* | STOX1    | 0.2112 | 0.1670 | 0.9655   | 3.166  | 0.0015 | 0.1362 |
| ENSG00000188610.7   | FAM72B   | 0.3712 | 0.0585 | 0.0050   | -3.165 | 0.0016 | 0.1362 |
| ENSG00000177932.6   | ZNF354C  | 0.0609 | 0.7408 | 0.8664   | 3.165  | 0.0016 | 0.1362 |
| ENSG00000198246.7   | SLC29A3  | 0.2722 | 0.4577 | 0.9708   | 3.161  | 0.0016 | 0.1367 |
| ENSG00000125864.7*  | BFSP1    | 0.2099 | 0.5362 | 0.9609   | 3.155  | 0.0016 | 0.1385 |
| ENSG00000100290.2*  | BIK      | 0.0278 | 0.1775 | 0.7026   | 3.145  | 0.0017 | 0.1421 |
| ENSG00000102409.9   | BEX4     | 0.8834 | 0.2411 | 0.0832   | -3.121 | 0.0018 | 0.1531 |
| ENSG00000130347.8   | RTN4IP1  | 0.0939 | 0.1037 | 0.0002   | -3.112 | 0.0019 | 0.1568 |
| ENSG00000166206.8   | GABRB3   | 0.9818 | 0.7704 | 0.3312   | -3.103 | 0.0019 | 0.1600 |
| ENSG00000156345.10* | CDK20    | 0.1596 | 0.0435 | 0.8826   | 3.093  | 0.0020 | 0.1646 |
| ENSG00000180953.7*  | ST20     | 0.9986 | 0.8343 | 0.9492   | -3.086 | 0.0020 | 0.1668 |
| ENSG00000116396.9*  | KCNC4    | 0.8887 | 0.9795 | 0.9993   | 3.074  | 0.0021 | 0.1711 |
| ENSG00000142798.11  | HSPG2    | 0.0560 | 0.0097 | 0.8411   | 3.061  | 0.0022 | 0.1774 |
| ENSG00000065150.12  | IPO5     | 0.0494 | 0.3856 | 0.8252   | 3.043  | 0.0023 | 0.1867 |
| ENSG00000214021.10* | TTLL3    | 0.8793 | 0.3992 | 0.9980   | 3.038  | 0.0024 | 0.1889 |
| ENSG00000238243.2*  | OR2W3    | 0.9143 | 0.9634 | 0.9985   | 3.035  | 0.0024 | 0.1892 |
| ENSG00000113971.13  | NPHP3    | 0.1498 | 0.6713 | 0.9027   | 3.031  | 0.0024 | 0.1904 |
| ENSG00000205129.4*  | C4orf47  | 0.5320 | 0.0246 | 0.0094   | -3.004 | 0.0027 | 0.2038 |
| ENSG00000104408.5   | EIF3E    | 0.0243 | 0.2498 | 0.7035   | 3.000  | 0.0027 | 0.2049 |
| ENSG00000204390.7   | HSPA1L   | 0.0001 | 0.0135 | 0.0684   | 2.978  | 0.0029 | 0.2160 |
| ENSG00000215790.2*  | SLC35E2  | 0.8684 | 0.9821 | 0.9991   | 2.977  | 0.0029 | 0.2160 |
| ENSG00000234444.3   | ZNF736   | 0.2645 | 0.0041 | 0.0261   | -2.973 | 0.0029 | 0.2163 |
| ENSG00000103426.7*  | CORO7    | 0.2185 | 0.0157 | 0.9572   | 2.970  | 0.0030 | 0.2163 |
| ENSG00000148459.10  | PDSS1    | 0.1670 | 0.0703 | 0.9198   | 2.968  | 0.0030 | 0.2163 |
| ENSG00000196409.6*  | ZNF658   | 0.7990 | 0.4423 | 0.0540   | -2.946 | 0.0032 | 0.2253 |
| ENSG00000155034.13  | FBXL18   | 0.0983 | 0.4271 | 0.8453   | 2.944  | 0.0032 | 0.2253 |
| ENSG00000141577.7   | AZI1     | 0.6248 | 0.1246 | 0.9919   | 2.941  | 0.0033 | 0.2253 |
| ENSG00000127415.8*  | IDUA     | 0.4142 | 0.9082 | 0.9716   | 2.939  | 0.0033 | 0.2253 |
| ENSG00000144395.12* | CCDC150  | 0.6998 | 0.9899 | 0.9933   | 2.938  | 0.0033 | 0.2253 |
| ENSG00000146574.10* | CCZ1B    | 0.5251 | 0.1204 | 0.0182   | -2.937 | 0.0033 | 0.2253 |
| ENSG00000186136.1   | TAS2R42  | 0.0002 | 0.0000 | 0.0064   | 2.935  | 0.0033 | 0.2253 |
| ENSG00000205517.6*  | RGL3     | 0.8356 | 0.9166 | 0.9998   | 2.933  | 0.0034 | 0.2253 |
| ENSG00000153898.8   | MCOLN2   | 0.0245 | 0.2354 | 0.6511   | 2.925  | 0.0034 | 0.2299 |
| ENSG00000198088.5*  | NUP62CL  | 0.9202 | 0.3414 | 0.2937   | -2.919 | 0.0035 | 0.2330 |



|                     |         |        |        |        |        |        |        |
|---------------------|---------|--------|--------|--------|--------|--------|--------|
| ENSG00000171368.10* | TPPP    | 0.8975 | 0.9533 | 0.9998 | 2.912  | 0.0036 | 0.2367 |
| ENSG00000162639.11* | HENMT1  | 0.8466 | 0.8086 | 0.1208 | -2.898 | 0.0038 | 0.2443 |
| ENSG00000105409.8   | ATP1A3  | 0.0071 | 0.1027 | 0.4239 | 2.896  | 0.0038 | 0.2443 |
| ENSG00000187583.5   | PLEKHN1 | 0.3282 | 0.0927 | 0.9569 | 2.896  | 0.0038 | 0.2443 |

---

|                                                            |         |        |        |        |       |          |          |
|------------------------------------------------------------|---------|--------|--------|--------|-------|----------|----------|
| Genes also identified in Hsieh et al. (ref 4 in main text) |         |        |        |        |       |          |          |
| ENSG00000118181.5                                          | RPS25   | 0.0051 | 0.1106 | 0.9036 | 5.715 | 1.10E-08 | 3.86E-05 |
| ENSG00000144713.8                                          | RPL32   | 0.0901 | 0.8279 | 0.9977 | 5.371 | 7.83E-08 | 0.0002   |
| ENSG00000026025.8                                          | VIM     | 0.0131 | 0.0665 | 0.9747 | 5.213 | 1.86E-07 | 0.0002   |
| ENSG00000100316.11                                         | RPL3    | 0.3350 | 0.9577 | 0.9998 | 5.146 | 2.67E-07 | 0.0003   |
| ENSG00000204628.7                                          | GNB2L1  | 0.0234 | 0.2860 | 0.9817 | 5.140 | 2.75E-07 | 0.0003   |
| ENSG00000108107.7                                          | RPL28   | 0.0791 | 0.3941 | 0.9953 | 5.108 | 3.26E-07 | 0.0003   |
| ENSG00000197756.4                                          | RPL37A  | 0.1047 | 0.8223 | 0.9967 | 5.070 | 3.97E-07 | 0.0003   |
| ENSG00000109971.8                                          | HSPA8   | 0.0149 | 0.0708 | 0.9680 | 4.957 | 7.14E-07 | 0.0006   |
| ENSG00000177600.4                                          | RPLP2   | 0.0790 | 0.8218 | 0.9918 | 4.879 | 1.07E-06 | 0.0008   |
| ENSG00000142676.8                                          | RPL11   | 0.0760 | 0.6459 | 0.9832 | 4.696 | 2.65E-06 | 0.0016   |
| ENSG00000161970.7                                          | RPL26   | 0.3621 | 0.9494 | 0.9992 | 4.688 | 2.76E-06 | 0.0016   |
| ENSG00000170889.9                                          | RPS9    | 0.1487 | 0.4601 | 0.9961 | 4.685 | 2.80E-06 | 0.0016   |
| ENSG00000112306.7                                          | RPS12   | 0.8796 | 0.9994 | 1.0000 | 4.389 | 1.14E-05 | 0.0050   |
| ENSG00000008988.5                                          | RPS20   | 0.2398 | 0.7082 | 0.9976 | 4.348 | 1.38E-05 | 0.0058   |
| ENSG00000198755.6                                          | RPL10A  | 0.0961 | 0.6051 | 0.9815 | 4.331 | 1.48E-05 | 0.0058   |
| ENSG00000142541.10                                         | RPL13A  | 0.9352 | 0.9977 | 1.0000 | 4.278 | 1.89E-05 | 0.0071   |
| ENSG00000170275.8                                          | CRTAP   | 0.6913 | 0.9692 | 0.9999 | 4.269 | 1.96E-05 | 0.0071   |
| ENSG00000149273.8                                          | RPS3    | 0.0941 | 0.7106 | 0.9842 | 4.255 | 2.09E-05 | 0.0073   |
| ENSG00000104529.12                                         | EEF1D   | 0.3218 | 0.6687 | 0.9967 | 4.229 | 2.35E-05 | 0.0080   |
| ENSG00000197958.8                                          | RPL12   | 0.8591 | 0.9873 | 0.9999 | 4.217 | 2.48E-05 | 0.0081   |
| ENSG00000140988.9                                          | RPS2    | 0.9074 | 0.9764 | 0.9999 | 4.201 | 2.66E-05 | 0.0085   |
| ENSG00000163584.13                                         | RPL22L1 | 0.1387 | 0.5828 | 0.9904 | 4.181 | 2.91E-05 | 0.0090   |
| ENSG00000198034.6                                          | RPS4X   | 0.1826 | 0.9079 | 0.9910 | 4.137 | 3.51E-05 | 0.0100   |
| ENSG00000101210.6                                          | EEF1A2  | 0.0562 | 0.0901 | 0.9559 | 4.118 | 3.82E-05 | 0.0103   |
| ENSG00000005022.5                                          | SLC25A5 | 0.0056 | 0.0217 | 0.7855 | 4.097 | 4.19E-05 | 0.0110   |
| ENSG00000188846.8                                          | RPL14   | 0.2300 | 0.6697 | 0.9939 | 4.079 | 4.52E-05 | 0.0111   |
| ENSG00000090621.8                                          | PABPC4  | 0.2992 | 0.7515 | 0.9972 | 4.078 | 4.54E-05 | 0.0111   |
| ENSG00000148303.12                                         | RPL7A   | 0.4941 | 0.9736 | 0.9986 | 4.024 | 5.72E-05 | 0.0131   |
| ENSG00000065978.12                                         | YBX1    | 0.5918 | 0.9097 | 0.9992 | 4.010 | 6.07E-05 | 0.0135   |
| ENSG00000162244.5                                          | RPL29   | 0.3485 | 0.8358 | 0.9976 | 4.001 | 6.31E-05 | 0.0135   |
| ENSG00000156508.12                                         | EEF1A1  | 0.6632 | 0.9981 | 0.9997 | 3.998 | 6.38E-05 | 0.0135   |
| ENSG00000101444.7                                          | AHCY    | 0.1245 | 0.2899 | 0.9817 | 3.992 | 6.56E-05 | 0.0135   |
| ENSG00000130741.5                                          | EIF2S3  | 0.0392 | 0.3855 | 0.9395 | 3.971 | 7.17E-05 | 0.0145   |
| ENSG00000111640.8                                          | GAPDH   | 0.1257 | 0.1295 | 0.9776 | 3.953 | 7.73E-05 | 0.0154   |
| ENSG00000137154.8                                          | RPS6    | 0.2433 | 0.8593 | 0.9920 | 3.909 | 9.28E-05 | 0.0179   |
| ENSG00000110700.2                                          | RPS13   | 0.0530 | 0.2643 | 0.9377 | 3.907 | 9.36E-05 | 0.0179   |
| ENSG00000161016.10                                         | RPL8    | 0.2280 | 0.5500 | 0.9895 | 3.823 | 0.0001   | 0.0227   |
| ENSG00000254772.4                                          | EEF1G   | 0.7727 | 0.9958 | 0.9998 | 3.801 | 0.0001   | 0.0245   |
| ENSG00000125691.7                                          | RPL23   | 0.2930 | 0.8450 | 0.9914 | 3.719 | 0.0002   | 0.0324   |
| ENSG00000122406.6                                          | RPL5    | 0.1556 | 0.8827 | 0.9762 | 3.712 | 0.0002   | 0.0328   |
| ENSG00000131269.10                                         | ABCB7   | 0.0006 | 0.0037 | 0.2989 | 3.702 | 0.0002   | 0.0337   |
| ENSG00000205339.5                                          | IPO7    | 0.0552 | 0.4454 | 0.9219 | 3.646 | 0.0003   | 0.0412   |
| ENSG00000171858.11                                         | RPS21   | 0.2330 | 0.5493 | 0.9728 | 3.595 | 0.0003   | 0.0481   |
| ENSG00000163931.10                                         | TKT     | 0.0251 | 0.0245 | 0.8346 | 3.588 | 0.0003   | 0.0488   |

|                    |         |        |        |        |       |        |        |
|--------------------|---------|--------|--------|--------|-------|--------|--------|
| ENSG00000138326.12 | RPS24   | 0.1031 | 0.6285 | 0.9570 | 3.542 | 0.0004 | 0.0551 |
| ENSG00000156482.6  | RPL30   | 0.3497 | 0.8755 | 0.9923 | 3.525 | 0.0004 | 0.0574 |
| ENSG00000173599.9  | PC      | 0.0428 | 0.0175 | 0.8824 | 3.492 | 0.0005 | 0.0631 |
| ENSG00000171863.8  | RPS7    | 0.0587 | 0.3194 | 0.9061 | 3.463 | 0.0005 | 0.0670 |
| ENSG00000174444.9  | RPL4    | 0.1724 | 0.6487 | 0.9742 | 3.442 | 0.0006 | 0.0707 |
| ENSG00000142937.7  | RPS8    | 0.6083 | 0.7882 | 0.9970 | 3.422 | 0.0006 | 0.0747 |
| ENSG00000070756.8  | PABPC1  | 0.9744 | 0.9999 | 1.0000 | 3.405 | 0.0007 | 0.0767 |
| ENSG00000063177.7  | RPL18   | 0.1226 | 0.3589 | 0.9501 | 3.399 | 0.0007 | 0.0773 |
| ENSG00000145592.9  | RPL37   | 0.4290 | 0.8322 | 0.9941 | 3.377 | 0.0007 | 0.0773 |
| ENSG00000147677.6  | EIF3H   | 0.0674 | 0.4743 | 0.8952 | 3.301 | 0.0010 | 0.0950 |
| ENSG00000135390.12 | ATP5G2  | 0.0041 | 0.0164 | 0.3490 | 3.214 | 0.0013 | 0.1232 |
| ENSG00000137955.10 | RABGGTB | 0.1182 | 0.6948 | 0.9144 | 3.080 | 0.0021 | 0.1692 |
| ENSG00000134419.10 | RPS15A  | 0.8890 | 0.9863 | 0.9993 | 3.028 | 0.0025 | 0.1907 |
| ENSG00000187109.8  | NAP1L1  | 0.3603 | 0.9182 | 0.9815 | 3.003 | 0.0027 | 0.2038 |
| ENSG00000178035.6  | IMPDH2  | 0.0235 | 0.0900 | 0.6855 | 2.979 | 0.0029 | 0.2160 |
| ENSG00000100129.11 | EIF3L   | 0.1485 | 0.7605 | 0.9323 | 2.969 | 0.0030 | 0.2163 |
| ENSG00000167526.9  | RPL13   | 0.8475 | 0.9673 | 0.9989 | 2.961 | 0.0031 | 0.2198 |
| ENSG00000164587.7  | RPS14   | 0.2637 | 0.7238 | 0.9621 | 2.941 | 0.0033 | 0.2253 |
| ENSG00000186468.8  | RPS23   | 0.1339 | 0.5645 | 0.9039 | 2.935 | 0.0033 | 0.2253 |

**Supplementary Table 3: mRNA translation downstream of mTOR.** Genes identified by Babel analysis as having significant mRNA translational changes (FDR < 25%) upon inhibition of PC3 cells with the mTOR inhibitor PP242.

|                              | Significance |         | Complex formation <sup>[b]</sup> | Subunit status | Refs <sup>[c]</sup> |
|------------------------------|--------------|---------|----------------------------------|----------------|---------------------|
|                              | P-value      | Q-value |                                  |                |                     |
| Expressed                    |              |         |                                  |                |                     |
| <i>EIF3A</i>                 | 7.11E-04     | 0.077   | Essential                        | Conserved      |                     |
| <i>EIF3F</i>                 | 7.12E-04     | 0.077   | Essential                        | Non-conserved  |                     |
| <i>EIF3H</i>                 | 9.65E-04     | 0.095   | Essential                        | Non-conserved  | [4,6]               |
| <i>EIF3E</i>                 | 2.70E-03     | 0.205   | Essential                        | Non-conserved  |                     |
| <i>EIF3L</i>                 | 2.99E-03     | 0.216   | Dispensable                      | Non-conserved  | [4,6]               |
| <i>EIF3D</i>                 | 0.080        | -       | Dispensable                      | Non-conserved  |                     |
| <i>EIF3M</i>                 | 0.092        | -       | N.A.                             | N.A.           |                     |
| <i>EIF3I</i>                 | N.S.         | -       | Dispensable                      | Conserved      |                     |
| <i>EIF3B</i>                 | N.S.         | -       | Essential                        | Conserved      |                     |
| <i>EIF3J</i>                 | N.S.         | -       | Dispensable                      | N.A.           |                     |
| Not expressed <sup>[a]</sup> |              |         |                                  |                |                     |
| <i>EIF3C</i>                 | -            |         | Essential                        | Conserved      |                     |
| <i>EIF3G</i>                 | -            |         | Dispensable                      | Conserved      |                     |
| <i>EIF3K</i>                 | -            |         | Dispensable                      | Non-conserved  |                     |

[a] Unexpressed genes not assessed by Babel analysis

[b] Subunit is part of the functional core essential for mammalian eIF3 complex formation

[c] Previously identified mTOR-mediated mRNA translational change

**Supplementary Table 4: mRNA translation of eukaryotic initiation factor 3.** Shown here is the landscape of mTOR-dependent mRNA translation of genes encoding subunits of the eIF3 complex.

## SUPPLEMENTARY NOTE

### *Low expressing genes*

An important issue in analyzing ribosome profiling data, and more generally all count-based RNA data, is how to handle genes with low expression in a given transcriptome. In previous ribosome profiling studies (Bazzini, et al., 2012; Guo, et al., 2010; Hsieh, et al., 2012; Ingolia, et al., 2009; Ingolia, et al., 2011; Thoreen, et al., 2012), genes with low mRNA counts were eliminated from consideration and analysis, typically on the basis of an absolute threshold in read counts irrespective of gene size (such as 128 or 256). While such an approach is rational, we believe it does not fully utilize the information in such data. Here, we sought to preserve the largest fraction of the expressed transcriptome that is supported by data. Therefore, we developed a simulation-based method, described in the Methods, to estimate whether genes were expressed based on mRNA count, size of the gene, and size of the mRNA library that is similar to a previous approach (Ramskold, et al., 2009). The result is that we typically analyze a higher proportion of genes (typically greater than 10,000 transcripts per transcriptome).

Nevertheless, this approach does not avoid completely the issue of low counts, but rather shifts it to the ribosome-protected fragments (RPF) data. Here, using our parametric bootstrap method for estimating p-values, two issues arise: (1) it is not possible to find significantly decreased ribosome counts when the expected count is low, and (2) the p-values for low count data can be inaccurate. The latter complication is subtle, as the number of unique RPF counts in the bootstrap distribution limits the number of potential p-values for a particular mRNA value. If the former is small, then every increase in RPF count leads to a substantial jump in the p-value. In addition, a few false positive reads could have a large impact on the p-value, which amplifies the importance of the approach used for read alignment.

The solution to the low count problem is not straightforward, as it depends on both the mRNA and RPF dispersion and the RPF library size. Additionally, while greater depth of coverage for the library may resolve some cases, it is by no means a solution for all genes, as has been demonstrated in RNA-seq data previously. The Babel framework is robust to including low RPF-count genes, so a sensible strategy is to fit all genes that pass the expression filter and then to give additional scrutiny to those genes that have low expected RPF counts, or more simply, low observed RPF counts.

### *Histone genes*

In every ribosome profiling data set that we have analyzed we have observed the apparent and persistent translational regulation (greater than expected ribosome association given mRNA abundance) of genes encoding members of the histone complex (H1, H2A, H2B, H3, and H4). However, non-variant histone proteins are encoded by replication-dependent genes that are not polyadenylated, rather they are transcriptionally and translationally regulated by a unique 3' stem loop (Marzluff, et al., 2008). As a result, the poly(A)<sup>+</sup> selection step in the mRNA library preparation will result in an under-representation of non-polyadenylated transcripts, altering the relationship between observed ribosome association and mRNA levels. Therefore, of the 71 genes encoding subunits of histone complexes present in the Gencode-derived unified gene model used by Babel, the subset determined to be expressed in a given transcriptome (see Methods) are excluded from the statistical assessment of mRNA translation (48 histone-encoding genes among 10,582 expressed genes in the PC3 data analyzed here).

## SUPPLEMENTARY REFERENCES

Bazzini, A.A., Lee, M.T. and Giraldez, A.J. (2012) Ribosome profiling shows that miR-430 reduces translation before causing mRNA decay in zebrafish, *Science*, **336**, 233-237.

Guo, H., *et al.* (2010) Mammalian microRNAs predominantly act to decrease target mRNA levels, *Nature*, **466**, 835-840.

Hsieh, A.C., *et al.* (2012) The translational landscape of mTOR signalling steers cancer initiation and metastasis, *Nature*, **485**, 55-61.

Ingolia, N.T., *et al.* (2009) Genome-wide analysis in vivo of translation with nucleotide resolution using ribosome profiling, *Science*, **324**, 218-223.

Ingolia, N.T., Lareau, L.F. and Weissman, J.S. (2011) Ribosome profiling of mouse embryonic stem cells reveals the complexity and dynamics of mammalian proteomes, *Cell*, **147**, 789-802.

Marzluff, W.F., Wagner, E.J. and Duronio, R.J. (2008) Metabolism and regulation of canonical histone mRNAs: life without a poly(A) tail, *Nat Rev Genet*, **9**, 843-854.

Ramskold, D., *et al.* (2009) An abundance of ubiquitously expressed genes revealed by tissue transcriptome sequence data, *PLoS Comput Biol*, **5**, e1000598.

Thoreen, C.C., *et al.* (2012) A unifying model for mTORC1-mediated regulation of mRNA translation, *Nature*, **485**, 109-113.
